# Supplementary material for: Association between oral health and bowel habits: a cross-sectional study
Source: Research Square preprint supplement (doi:10.21203/rs.3.rs-5733361/v1), 2025-04-07
Supplement: Supplementary file 1 [file 343457577abcddb3cdcad860.docx]

**Supplementary Table S2**: Weighted univariate and multivariate logistic regression analysis after multiple imputation.

|  | Crude model | |  | Model1 | |  | Model2 | |
| --- | --- | --- | --- | --- | --- | --- | --- | --- |
| OR (95% CI) | *P* value | OR (95% CI) | *P* value | OR (95% CI) | *P* value |
| Condition of teeth |  |  |  |  |  |  |  |  |
| Bowel habits |  |  |  |  |  |  |  |  |
| Normal | Ref |  |  | Ref |  |  | Ref |  |
| Chronic constipation | 1.65 (1.28-2.13) | < 0.001 |  | 1.37 (1.01-1.85) | 0.045 |  | 1.40 (1.07-1.83) | 0.017 |
| Chronic diarrhea | 1.63 (1.29-2.06) | < 0.001 |  | 1.37 (1.10-1.71) | 0.007 |  | 1.18 (0.93-1.51) | 0.156 |
| *P* for trend |  | < 0.001 |  |  | < 0.001 |  |  | 0.005 |
| Frequency of oral pain |  |  |  |  |  |  |  |  |
| Bowel habits |  |  |  |  |  |  |  |  |
| Normal | Ref |  |  | Ref |  |  | Ref |  |
| Chronic constipation | 1.33 (0.93-1.90) | 0.111 |  | 1.09 (0.79-1.50) | 0.574 |  | 1.09 (0.66-1.78) | 0.671 |
| Chronic diarrhea | 1.66 (1.20-2.29) | 0.003 |  | 1.48 (1.04-2.10) | 0.032 |  | 1.59 (1.03-2.44) | 0.041 |
| *P* for trend |  | < 0.001 |  |  | 0.033 |  |  | 0.007 |
