# Supplementary material for: Association between oral health and bowel habits: a cross-sectional study
Source: Research Square preprint supplement (doi:10.21203/rs.3.rs-5733361/v1), 2025-04-07
Supplement: Supplementary file 2 [file ef366d5a8408e2a04d9152e8.docx]

**Table S1**: Stratified and interaction analysis of bowel habits and poor teeth condition.

| Characteristic | Poor teeth condition, OR (95% CI) | | *P* for interaction |
| --- | --- | --- | --- |
| Chronic diarrhea | Chronic constipation |
| Age |  |  | 0.554 |
| 20-39 | 1.93 (1.18-3.14) | 1.02 (0.64-1.62) |  |
| 40-59 | 1.32 (0.91-1.92) | 1.73 (1.22-2.45) |  |
| 60-85 | 1.94 (1.41-2.65) | 1.14 (0.75-1.72) |  |
| Sex |  |  | 0.569 |
| Female | 1.91 (1.44-2.55) | 1.16 (0.87-1.54) |  |
| Male | 1.67 (1.20-2.31) | 1.62 (1.10-2.39) |  |
| Race |  |  | 0.370 |
| Mexican American | 1.27 (0.78-2.08) | 0.76 (0.44-1.29) |  |
| Other Hispanic | 2.17 (1.08-4.36) | 0.81 (0.33-2.00) |  |
| Non-Hispanic White | 1.76 (1.25-2.48) | 1.49 (1.06-2.11) |  |
| Non-Hispanic Black | 2.17 (1.42-3.25) | 1.49 (0.98-2.26) |  |
| Other race | 0.95 (0.21-3.64) | 1.03 (0.22-3.96) |  |
| Education |  |  | 0.396 |
| < High School | 1.68 (1.23-2.30) | 1.07 (0.76-1.52) |  |
| High School | 1.38 (0.87-2.19) | 1.38 (0.91-2.08) |  |
| > High School | 1.59 (0.96-2.33) | 1.04 (0.65-1.67) |  |
| Poverty-to-income ratio |  |  | 0.206 |
| < 1.3 | 1.60 (1.16-2.21) | 0.93 (0.65-1.32) |  |
| 1.3 - 3.5 | 1.38 (0.95-1.97) | 1.08 (0.75-1.53) |  |
| > 3.5 | 2.38 (1.35-3.98) | 2.18 (1.22-3.70) |  |
| Marital status |  |  | 0.875 |
| Divorced/Separated/Widowed | 1.57 (1.05-2.31) | 1.60 (1.09-2.32) |  |
| Married/Living with a partner | 1.56 (1.15-2.08) | 1.13 (0.80-1.54) |  |
| Never married | 3.52 (2.01-6.00) | 0.89 (0.44-1.64) |  |
| BMI |  |  | 0.479 |
| < 18.5 | 2.65 (0.70-9.72) | 0.49 (0.07-1.97) |  |
| 18.5 - 24 | 1.81 (1.05-3.00) | 1.38 (0.87-2.13) |  |
| > 24 | 1.75 (1.37-2.22) | 1.26 (0.96-1.64) |  |
| Smoking |  |  | 0.854 |
| Never | 2.00 (1.40-2.80) | 1.08 (0.75-1.52) |  |
| Fomer | 1.49 (0.98-2.22) | 1.60 (1.00-2.48) |  |
| Current | 1.41 (0.93-2.15) | 1.46 (0.92-2.30) |  |
| Alcohol consumption |  |  | 0.262 |
| No | 1.48 (1.02-2.11) | 1.00 (0.69-1.42) |  |
| Yes | 1.95 (1.49-2.54) | 1.43 (1.06-1.90) |  |
| Vigorous activities |  |  | 0.331 |
| No | 1.90 (1.40-2.53) | 1.20 (0.86-1.67) |  |
| Yes | 2.11 (0.77-4.96) | 1.17 (0.39-2.81) |  |
| Unknown | 1.52 (1.07-2.12) | 1.30 (0.93-1.80) |  |
| Depression |  |  | 0.796 |
| No | 1.67 (1.30-2.12) | 1.16 (0.89-1.49) |  |
| Yes | 1.48 (0.89-2.41) | 1.27 (0.74-2.14) |  |
| Diabetes |  |  | 0.092 |
| No | 2.05(1.61-2.59) | 1.23 (0.96-1.58) |  |
| Yes | 0.91 (0.53-1.48) | 1.50 (0.85-2.55) |  |
| Water intake |  |  | 0.628 |
| < 667 | 1.78 (1.35-2.34) | 1.17 (0.86-1.56) |  |
| ≥ 667 | 1.71 (1.20-2.40) | 1.37 (0.95-1.93) |  |
| Total sugars |  |  | 0.571 |
| < 100 | 1.94 (1.45-2.56) | 1.18 (0.85-1.61) |  |
| ≥ 100 | 1.59 (1.13-2.21) | 1.37 (0.98-1.87) |  |
| Dietary fiber intake |  |  | 0.061 |
| < 25 | 2.04 (1.63-2.54) | 1.38 (1.08-1.73) |  |
| ≥ 25 | 0.40 (0.12-0.98) | 0.44 (0.13-1.09) |  |
| WBC count |  |  | 0.678 |
| < 10 | 1.83 (1.45-2.29) | 1.20 (0.94-1.54) |  |
| ≥ 10 | 1.56 (0.80-2.86) | 1.61 (0.89-2.79) |  |
| Neutrophils percent |  |  | 0.719 |
| ≤ 75 | 1.83 (1.47-2.27) | 1.26 (0.99-1.59) |  |
| > 75 | 1.00 (0.23-3.16) | 1.31 (0.50-3.07) |  |
| CRP |  |  | 0.960 |
| 0.01 - 0.99 | 1.73 (1.36-2.18) | 1.15 (0.89-1.47) |  |
| 1.00 -20.00 | 2.06 (1.20-3.43) | 2.09 (1.19-3.56) |  |
| Serum Calcium |  |  | 0.233 |
| 7.0 - 9.0 | 1.57 (0.91-2.60) | 0.66 (0.29-1.50) |  |
| 9.1 - 11.5 | 1.83 (1.44-2.31) | 1.38 (1.09-1.75) |  |
