# Supplementary material for: Association between oral health and bowel habits: a cross-sectional study
Source: Research Square preprint supplement (doi:10.21203/rs.3.rs-5733361/v1), 2025-04-07
Supplement: Supplementary file 3 [file ef70e0fe9a4457925644a49f.docx]

**Supplementary Table S3**: Sensitivity analysis: univariate and multivariate logistic regression after excluding participants with diabetes, depression, or elevated CRP (≥1 mg/dL).

|  | Crude model | |  | Model1 | |  | Model2 | |
| --- | --- | --- | --- | --- | --- | --- | --- | --- |
| OR (95% CI) | *P* value | OR (95% CI) | *P* value | OR (95% CI) | *P* value |
| Condition of teeth |  |  |  |  |  |  |  |  |
| Bowel habits |  |  |  |  |  |  |  |  |
| Normal | Ref |  |  | Ref |  |  | Ref |  |
| Chronic constipation | 1.45 (1.02-2.07) | 0.040 |  | 1.29 (0.91-1.85) | 0.166 |  | 1.45 (1.00-2.11) | 0.049 |
| Chronic diarrhea | 1.71 (1.22-2.39) | 0.003 |  | 1.45 (1.01-2.10) | 0.036 |  | 1.39 (0.96-2.02) | 0.086 |
| *P* for trend |  | < 0.001 |  |  | 0.022 |  |  | 0.014 |
| Frequency of oral pain |  |  |  |  |  |  |  |  |
| Bowel habits |  |  |  |  |  |  |  |  |
| Normal | Ref |  |  | Ref |  |  | Ref |  |
| Chronic constipation | 1.37 (0.92-2.14) | 0.154 |  | 1.13 (0.72-1.79) | 0.588 |  | 1.19 (0.76-1.88) | 0.441 |
| Chronic diarrhea | 1.72 (1.01-3.01) | 0.042 |  | 1.66 (0.95-2.93) | 0.077 |  | 1.60 (0.90-2.85) | 0.102 |
| *P* for trend |  | 0.037 |  |  | 0.140 |  |  | 0.148 |
